# Supplementary material
Source: publisher site journal article supplement (https://neobiota.pensoft.net/article/82636/download/suppl/32/)

# **Plankton hitch-hikers on naturalist's instruments as silent intruders of aquatic ecosystems: current risks and possible prevention**

Łukasz Wejnerowski <sup>1</sup>, Tümer Orhun Aykut <sup>2</sup>, Aleksandra Pełechata <sup>1</sup>, Michał Rybak <sup>3</sup>, Tamara Dulić <sup>4</sup>, Jussi Meriluoto <sup>4</sup>, Marcin Krzysztof Dziuba <sup>5</sup>

**1** Department of Hydrobiology, Institute of Environmental Biology, Faculty of Biology, Adam Mickiewicz University, Poznań, Poland **2** Department of Biology, Institute of Science, Istanbul University, Istanbul, Turkey **3** Department of Water Protection, Institute of Environmental Biology, Faculty of Biology, Adam Mickiewicz University, Poznań, Poland **4** Biochemistry, Faculty of Science and Engineering, Åbo Akademi University, Turku, Finland **5** Department of Ecology and Evolutionary Biology, University of Michigan, Ann Arbor, USA

Corresponding author: Łukasz Wejnerowski ([wejner@amu.edu.pl](mailto:wejner@amu.edu.pl))

## **Supplementary Material 2**

### **Scheme of the handmade plankton nets used in the experiments and dimensions**

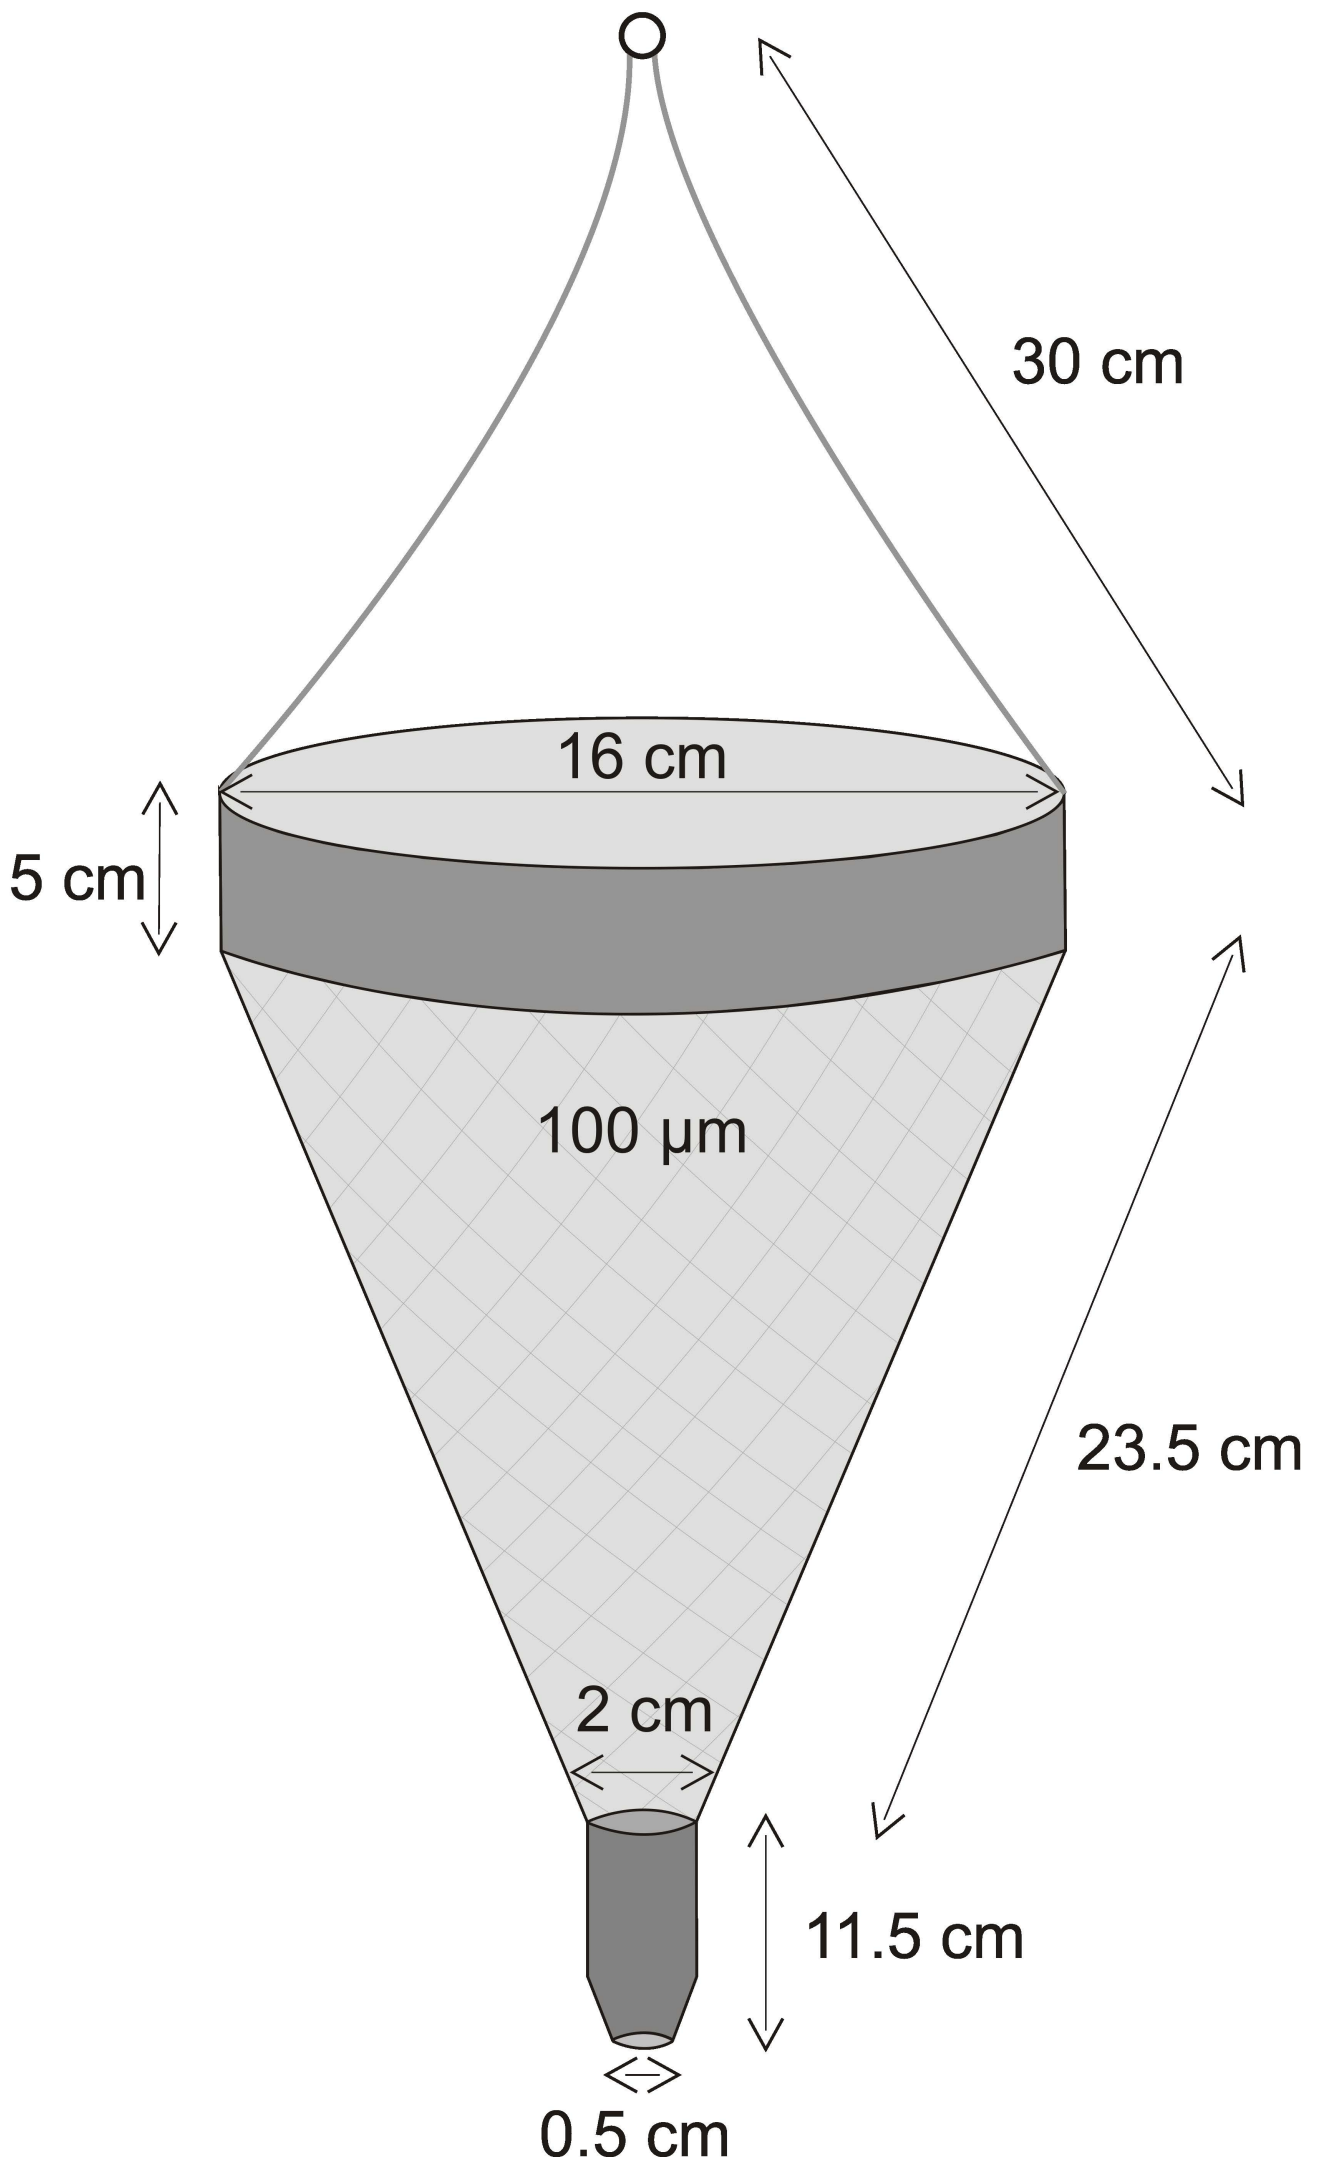

Supplement: Supplementary file 1
